# Supplementary material for: One-pot synthesis of carbon dot-entrenched chitosan-modified magnetic nanoparticles for fluorescence-based Cu2+ ion sensing and cell imaging
Source: Royal Society of Chemistry journal article supplement (doi:10.1039/c6ra10382k), 2016-01-01
Supplement: c6ra10382k1.pdf [file c6ra10382k1.pdf]

## Supporting information

### One pot synthesis of carbon dots entrenched chitosan modified magnetic nanoparticles for fluorescence based Cu<sup>2+</sup> ion sensing and cell imaging

Amit Kumar<sup>a</sup>, Angshuman Ray Chowdhuri<sup>a</sup>, Dipranjan Laha<sup>b</sup>, Soumen Chandra<sup>a</sup>, Parimal Karmakar<sup>b</sup>, Sumanta Kumar Sahu<sup>a\*</sup>

<sup>a</sup> Department of Applied Chemistry, Indian School of Mines, Dhanbad 826004, Jharkhand, India

<sup>b</sup> Department of Life Science and Biotechnology, Jadavpur University, 188, Raja S C Mallick Road, Kolkata 700032, India

\* Corresponding author. E-mail: [sahu.s.ac@ismdhanbad.ac.in](mailto:sahu.s.ac@ismdhanbad.ac.in), [sumantchem@gmail.com](mailto:sumantchem@gmail.com); Fax: +91 326-2307772; Tel: +91 3262235936

---

#### Synthesis of Fe<sub>3</sub>O<sub>4</sub>

The superparamagnetic Fe<sub>3</sub>O<sub>4</sub> nanoparticles were prepared by previously reported procedure<sup>1</sup>. In typical recipe, 0.324 g of FeCl<sub>3</sub> and 0.274 g of FeSO<sub>4</sub>.7H<sub>2</sub>O was taken in 40 mL Millipore water under argon atmosphere. The aqueous ammonia solution (2.5M) was dropped in to the reaction vessel with a violent stirring. The reaction was continued for 1 h at 80° C for complete growth of the nanoparticles. The obtained magnetite was washed with Millipore water under magnetic separation. After that, the resulting magnetic nanoparticles were dried in a vacuum oven at 50°C for overnight.

#### Synthesis of OCMC coated Fe<sub>3</sub>O<sub>4</sub> nanoparticles (Fe<sub>3</sub>O<sub>4</sub>@OCMC)

To prepare the Fe<sub>3</sub>O<sub>4</sub>@OCMC previous reported method<sup>2</sup>. In typical procedure, 500 mg of OCMC was dissolved in 50 mL of Millipore water and added dropwise in to the Fe<sub>3</sub>O<sub>4</sub> and stirring for 12 h at the room temperature for the preparation of OCMC coated Fe<sub>3</sub>O<sub>4</sub> nanoparticles (Fe<sub>3</sub>O<sub>4</sub>@OCMC). The obtained Fe<sub>3</sub>O<sub>4</sub>@OCMC was washed with ethanol and Millipore water to remove unreacted OCMC then dried in a vacuum oven at 50 °C for overnight.

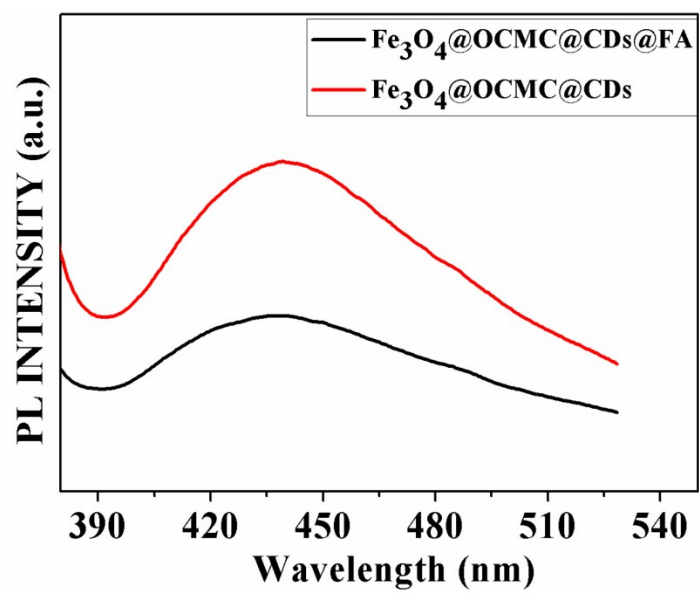

**Figure S1.** Photoluminescent spectra of  $\text{Fe}_3\text{O}_4@OCMC@CDs$  and  $\text{Fe}_3\text{O}_4@OCMC@CDs@FA$ .

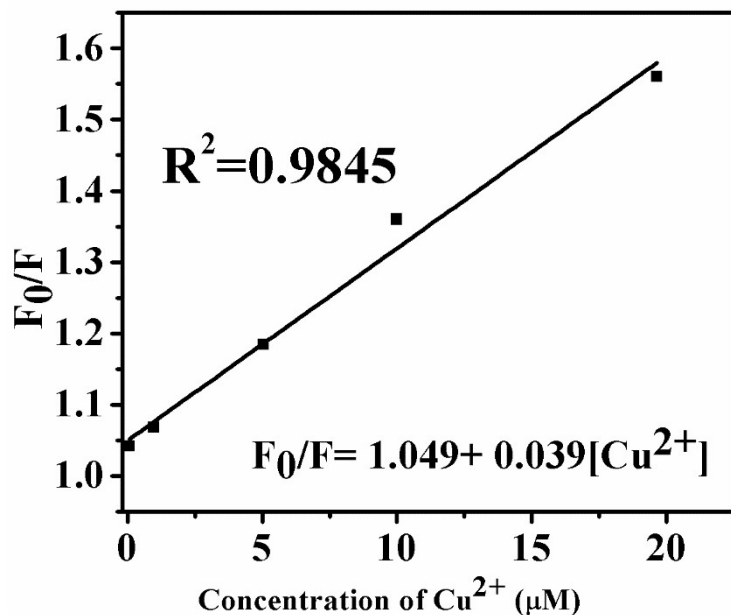

**Figure S2.** Linear dependence of fluorescence quenching of Fe<sub>3</sub>O<sub>4</sub>@CMC@CDs with copper ion (0-20 μM) concentration for LOD calculation.

**Calculation of detection limit (LOD):** All fluorescence emission spectra of the fluorophore were integrated vs. wavenumber, and calibration curves were generated, with the analyte concentration on the X-axis (in μM) and F<sub>0</sub>/F on the Y-axis, where F = the integrated fluorophore emission at a particular Cu<sup>2+</sup> ions concentration and F<sub>0</sub> = the integrated fluorophore emission in the absence of Cu<sup>2+</sup> ions. The lower fluoride concentrations yielded a linear relationship, and the equation for the line was determined. The limit of the blank was taken to be the average of the blank (without Cu<sup>2+</sup> ions) +3 times the standard deviation of the blank. This value was entered into the equation determined in (for the Y value), and the corresponding X value was determined. This value provided the LOD in μM.

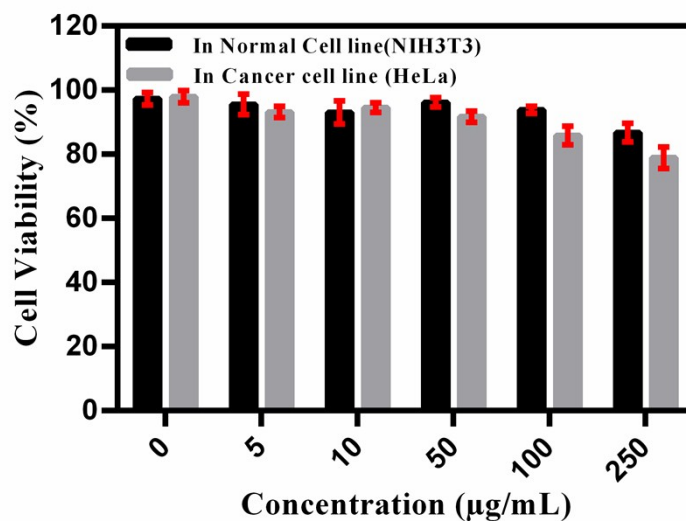

**Figure S3.** Cell viability study of Fe<sub>3</sub>O<sub>4</sub>@OCMC@CDs after exposure up to 250 µg/ml in different cell lines.

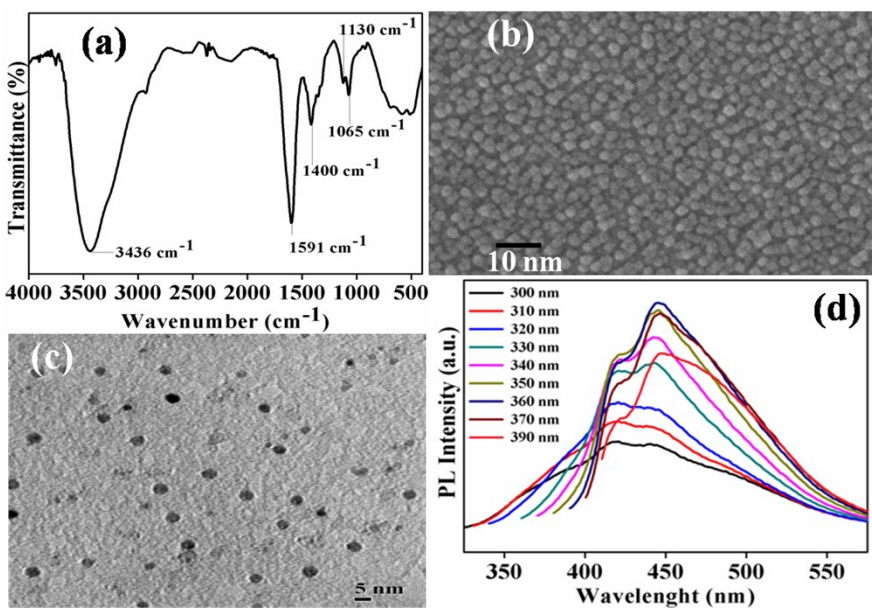

**Figure S4.** FT-IR spectra (a), FESEM image (b), TEM image (c) and PL spectra (at different excitation) of CDs (without Fe<sub>3</sub>O<sub>4</sub> nanoparticles).

## References

1. Mahto, T. K.; Chowdhuri, A. R.; Sahu, S. K. Polyaniline-Functionalized Magnetic Nanoparticles for the Removal of Toxic Dye from Wastewater, *Journal of applied polymer science* **2014**, *131*, 40840-40848.
2. Sahu, S. K.; Maiti, S.; Pramanik, A.; Ghosh, S. K.; Pramanik, P. Controlling the thickness of polymeric shell on magnetic nanoparticles loaded with doxorubicin for targeted delivery and MRI contrast agent, *Carbohydrate Polymers* **2012**, *87*, 2593– 2604.
